# Supplementary material
Source: publisher figshare collection journal article supplement (https://acs.figshare.com/ndownloader/files/3986407)
Supplement: Supplementary file 1 [file 3986407]

## **Supporting Information**

### **Photocatalytic Degradation of Water Contaminants in Multiple Photoreactors and the Evaluation of Reaction Kinetics Constants Independent of Photon Absorption, Irradiance, Reactor Geometry and Hydrodynamics**

Ivana Grčić<sup>a</sup> and Gianluca Li Puma<sup>b\*</sup>

<sup>a</sup> University of Zagreb, Faculty of Chemical Engineering and Technology, Marulicev trg 19, 10000 Zagreb, Croatia.

<sup>b</sup> Environmental Nanocatalysis and Photoreaction Engineering, Department of Chemical Engineering, Loughborough University, Loughborough, LE11 3TU, United Kingdom .

\* Corresponding author: Environmental Nanocatalysis and Photoreaction Engineering, Department of Chemical Engineering, Loughborough University, Loughborough, LE11 3TU, United Kingdom. Tel.: 0044(0)1509-222510; fax: 0044(0)1509-223923. E-mail address: g.lipuma@lboro.ac.uk (Prof. G. Li Puma).

Content: **Figure S1 and S2.** Emission spectra of UV lamps. **Figure S3.** Schematic representation of the geometry of the annular photocatalytic reactor. **Figure S4.** Forward photon flux emerging from the outer wall of PR1 at different catalyst concentrations and levels of irradiance. **Figure S5.** Results of the modeling of the photocatalytic oxidation of oxalic acid in PR1 with different model assumptions. **Table S1.** Photoreactors dimensions and lamp specifications. **Table S2.** Reaction scheme for the heterogeneous photodecomposition of oxalic acid on TiO<sub>2</sub>.

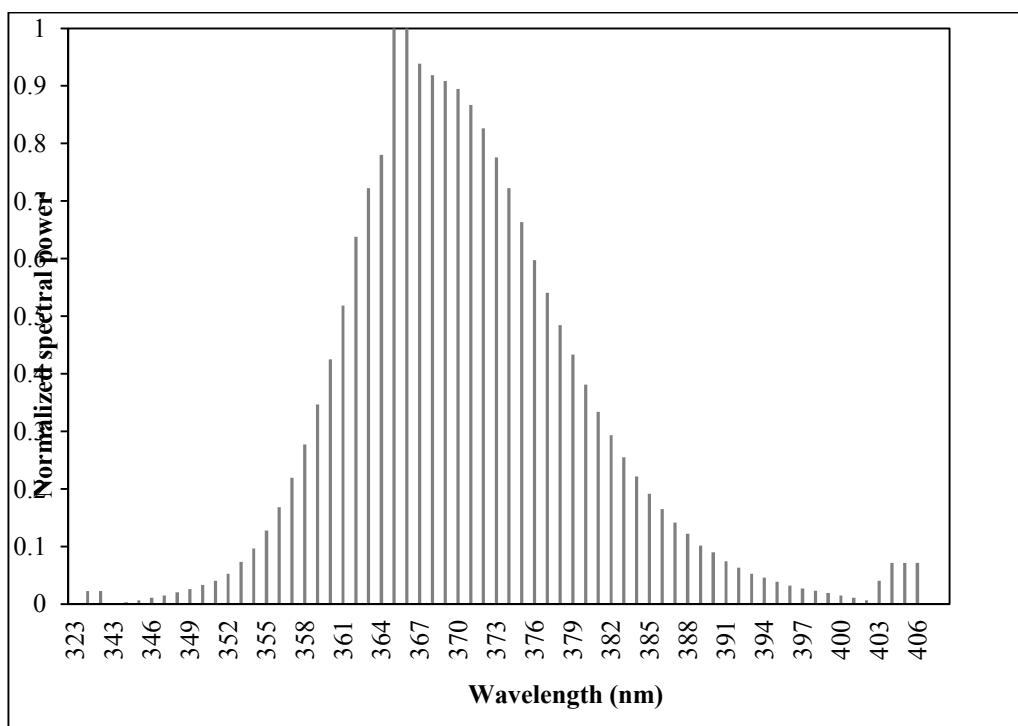

**Figure S1.** Emission spectrum for blacklight blue fluorescent lamps (Philips blacklight-blue TL 8W/08 F8 T5/BLB lamp).

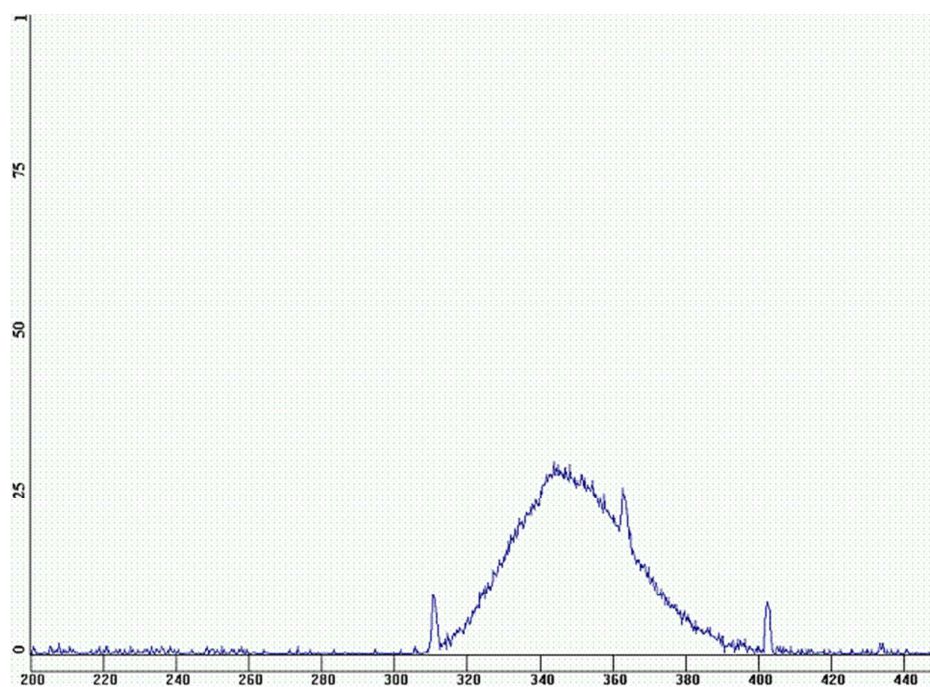

**Figure S2.** Emission spectrum for UVP Pen-Ray® mercury discharge lamp (model 90-0019-04) provided by UVP.

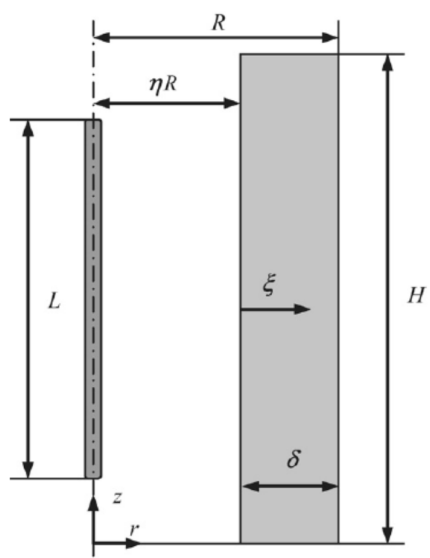

**Figure S3.** Schematic representation of the geometry of the annular photocatalytic reactor (reproduced from Toepfer et al.<sup>1</sup>).

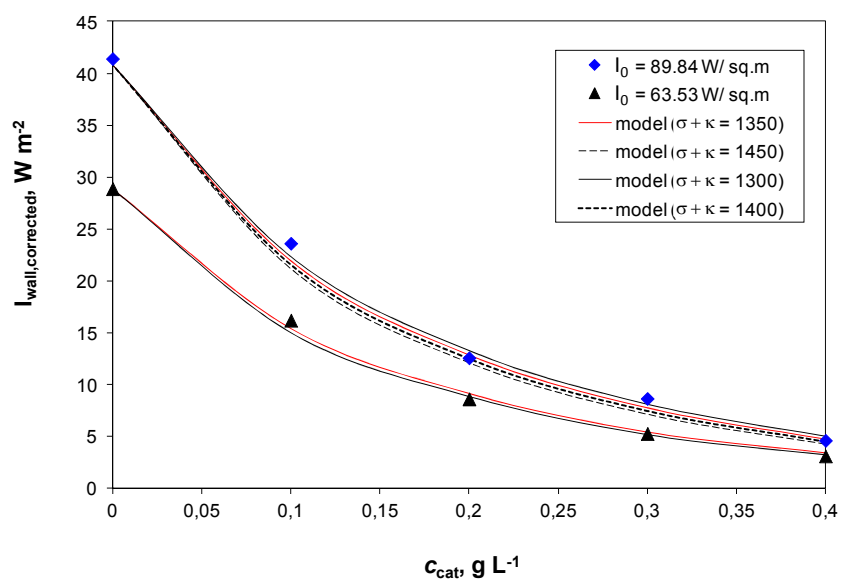

(a)

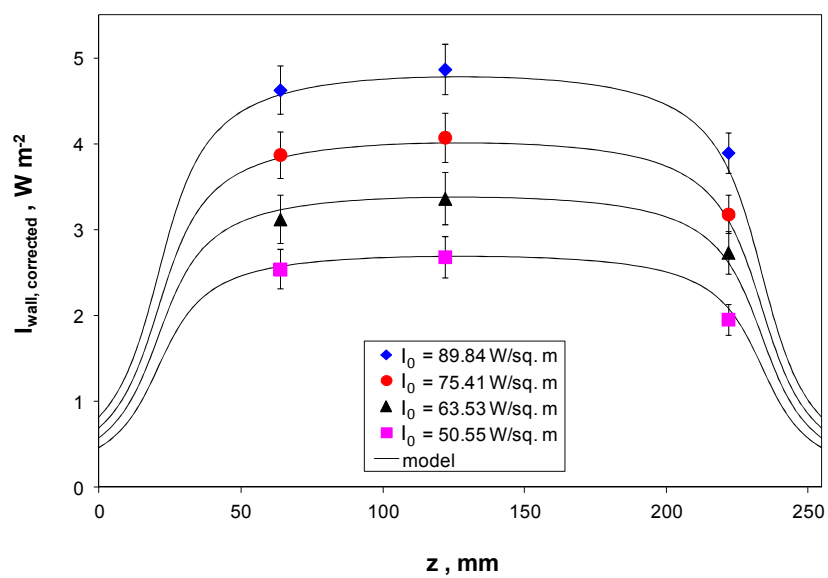

(b)

**Figure S4.** Forward photon flux emerging from the outer wall of PR1. (a) At different TiO<sub>2</sub> powder loadings and different levels of irradiance, at  $z^* = 0.5$ . Lines are the fitting of SFM with  $\omega = 0.8617$ , symbols are mean values of several measurements. (b) At different positions along the axial direction varying the irradiance. Lines are the fitting of SFM with  $\omega = 0.8617$ . [TiO<sub>2</sub>] = 0.4 g/L.

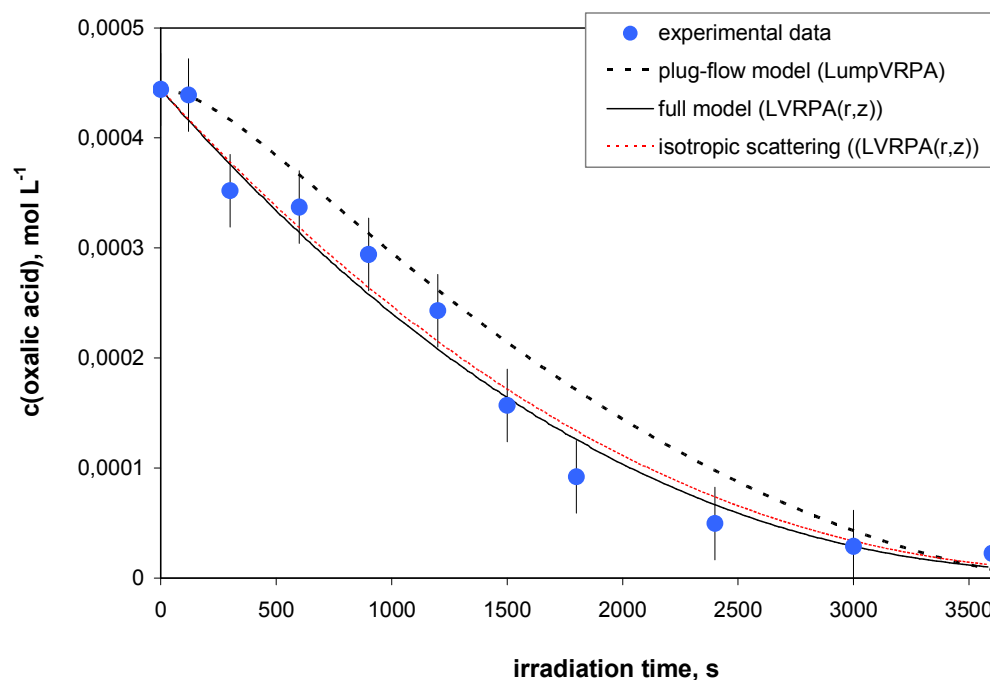

**Figure S5.** Results of the 5odelling of the photocatalytic oxidation of oxalic acid in PR1 with different model assumptions. pH = 4,  $[\text{TiO}_2] = 0.4 \text{ g/L}$ ;  $I_0 = 89.84 \text{ W m}^{-2}$ .

**Table S1** Photoreactors dimensions and lamp specifications.

| Photoreactor dimensions                |                   | PR1                        | PR2                   |
|----------------------------------------|-------------------|----------------------------|-----------------------|
| Length, $H$                            | m                 | 0.255                      | 0.095                 |
| Inner radius, $\eta R$                 | m                 | 0.013                      | 0.008                 |
| Outer radius, $R$                      | m                 | 0.018                      | 0.038                 |
| Irradiated volume, $V_r$               | $\text{m}^3$      | $1.34 \times 10^{-4}$      | $5.00 \times 10^{-4}$ |
| Lamp specifications                    |                   |                            |                       |
| Lamp type                              |                   | Philips TL 8W/08 F8 T5/BLB | PenRay 90-0019-04     |
| Irradiance at 2 cm from the source     | $\text{W m}^{-2}$ | 86.75                      | 12.55                 |
| Bulb length with uniform emission, $L$ | m                 | 0.213                      | 0.0538                |
| Bulb radius, $r_l$                     | m                 | 0.00753                    | 0.00475               |

**Table S2.** Reaction scheme for the heterogeneous photodecomposition of oxalic acid on TiO<sub>2</sub> according to Pozzo et al.<sup>2</sup>

| <i>Reaction step</i>            |                                                                                                                                                                                                                                                                                                                                  |
|---------------------------------|----------------------------------------------------------------------------------------------------------------------------------------------------------------------------------------------------------------------------------------------------------------------------------------------------------------------------------|
| S <sub>0</sub>                  | Activation (common to both pathways)<br>$\text{TiO}_2 + h\nu \rightarrow h^+ + e^-$                                                                                                                                                                                                                                              |
| S <sub>1</sub>                  | Adsorption (species A) on dark/illumination conditions<br>$[\text{site}] + \text{C}_2\text{O}_4\text{H}^-_{(\text{sol})} \leftrightarrow \text{C}_2\text{O}_4\text{H}^-_{(\text{ads})\text{A}}$                                                                                                                                  |
| S <sub>2</sub>                  | Adsorption (species B) on dark/illumination conditions<br>$[\text{site}] + \text{C}_2\text{O}_4\text{H}^-_{(\text{sol})} \leftrightarrow \text{C}_2\text{O}_4\text{H}^-_{(\text{ads})\text{B}}$                                                                                                                                  |
| S <sub>3</sub>                  | Adsorption of oxygen<br>$[\text{site}] + \text{O}_{2(\text{sol})} \leftrightarrow \text{O}_{2(\text{ads})}$                                                                                                                                                                                                                      |
| S <sub>4</sub> , S <sub>5</sub> | Hole trapping (via OH <sup>-</sup> ) and $\sigma$ bond rupture (fast kinetics)<br>$(\text{OH}^-)_{\text{ads}} + h^+ \leftrightarrow \text{OH}^\bullet$<br>$\text{C}_2\text{O}_4\text{H}^-_{(\text{ads})\text{B}} + \text{OH}^\bullet \rightarrow \text{CO}_2\text{H}^\bullet_{(\text{ads})\text{B}} + \text{CO}_2 + \text{OH}^-$ |
| S <sub>6</sub>                  | Hole trapping (direct) and $\sigma$ bond rupture (slow kinetics)<br>$\text{C}_2\text{O}_4\text{H}^-_{(\text{ads})\text{A}} + h^+ \rightarrow \text{CO}_2\text{H}^\bullet_{(\text{ads})\text{A}} + \text{CO}_2$                                                                                                                   |
| S <sub>7</sub>                  | Final mineralization (common to both mechanisms)<br>$\text{CO}_2\text{H}^\bullet_{(\text{ads})} + \text{O}_2 \rightarrow \text{O}_2\text{H}^\bullet + \text{CO}_2$                                                                                                                                                               |
| S <sub>8</sub>                  | Electron capture<br>$\text{O}_{2(\text{ads})} + e^- \rightarrow \text{O}_2^{\bullet-}_{(\text{ads})}$                                                                                                                                                                                                                            |
| S <sub>9</sub>                  | Hole–electron recombination<br>$e^- + h^+ \rightarrow \text{heat}$                                                                                                                                                                                                                                                               |
| S <sub>10-12</sub>              | Complementary (assumed fast) reactions<br>$\text{O}_2^{\bullet-} + \text{H}^+ \rightarrow \text{HO}_2^\bullet$<br>$2\text{HO}_2^\bullet \rightarrow \text{H}_2\text{O}_2 + \text{O}_2$<br>$\text{H}_2\text{O}_2 \rightarrow \text{H}_2\text{O} + 1/2 \text{O}_2$                                                                 |

## References (Supporting Information)

- (1) Toepfer, B.; Gora, A.; Li Puma, G. Photocatalytic oxidation of multicomponent solutions of herbicides: Reaction kinetics analysis with explicit photon absorption effects. *Appl. Catal. B: Environ.* **2006**, *68*, 171-180.
- (2) Pozzo, R. L.; Brandi, R. J.; Cassano, A. E.; Baltanás, M. A. Photocatalytic oxidation of oxalic acid in dilute aqueous solution, in a fully illuminated fluidized bed reactor. *Chem. Eng. Sci.* **2010**, *65*, 1345-1353
